# Supplementary material
Source: publisher site journal article supplement (https://www.dovepress.com/article/297491)
Supplement: Supplementary file 1 [file get_supplementary_file.php]

## Methods Appendix

To validate the survey instrument, a total of 16 cognitive interviews were completed via telephone with 8 patients with ADPKD and 8 nephrologists who treat ADPKD in the United States. Cognitive interviews were completed via telephone using a desktop sharing system, wherein the participants were able to see the questionnaire on the moderator’s computer. Participants were guided through the survey and answered accompanying questions on the survey items to assess comprehension.

The purpose of these interviews was to review the final survey instrument to ensure that the questions, language, and recall period of the survey items were fully understood by patients and physicians and to refine the questions where needed. The cognitive interviews were semi-structured to allow for flexibility in focusing on questions or language that required modification. Respondents reviewed each question and were asked to identify any items that they believed were unclear or confusing or additional items that they believed should be included. After all cognitive interviews were completed, the survey instruments were updated based on the recommended modifications (rewording, clarifications, additional items, and deletion of text or items). None of the reported survey data from the cognitive interviews was used in the quantitative phase of the study.
